# Supplementary material
Source: PubMed Central journal article supplement (PMC4349062)
Supplement: 7d50cda9dc7ea33a92017f87d9e85af7_genetics.114.173542-3.pdf [file 7d50cda9dc7ea33a92017f87d9e85af7_genetics.114.173542-3.pdf]

|      | Percentage of cells with indicated morphology                                     |                                                                                   |                                                                                   |                                                                                    | Total no. of cells counted |
|------|-----------------------------------------------------------------------------------|-----------------------------------------------------------------------------------|-----------------------------------------------------------------------------------|------------------------------------------------------------------------------------|----------------------------|
|      |  |  |  |  |                            |
| CAI4 | 61.1                                                                              | 24.7                                                                              | 0.4                                                                               | 13.8                                                                               | 247                        |
| CAS1 | 69.1                                                                              | 24.7                                                                              | 0.7                                                                               | 6                                                                                  | 133                        |
| CCS3 | 79.2                                                                              | 10.9                                                                              | 1.2                                                                               | 3.6                                                                                | 164                        |

**Figure S2** *C. albicans* wild-type (*SCH9/SCH9*), heterozygous (*SCH9/sch9*) and homozygous null mutant (*sch9/sch9*) strains were grown till  $OD_{600} \sim 1$  at  $30^\circ$  in normoxic condition in YPDU and were stained with DAPI. A table showing percentages of cells with indicated morphologies of DAPI-stained nuclei.
