# Supplementary material
Source: PubMed Central journal article supplement (PMC4349062)
Supplement: 8dde8727bacc2ba1631fea070c1e18a0_genetics.114.173542-2.pdf [file 8dde8727bacc2ba1631fea070c1e18a0_genetics.114.173542-2.pdf]

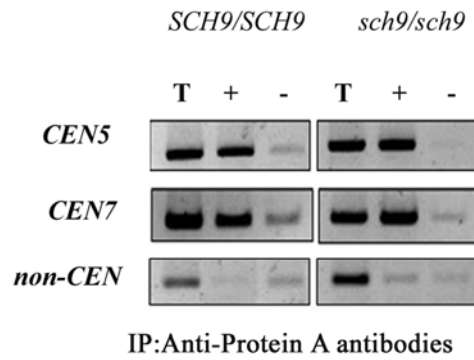

**Figure S3** Cse4 localisation at the centromere is not affected by absence of Sch9. Standard ChIP assays were performed on strains CAKS102 (*CSE4-TAP/CSE4;SCH9/SCH9*) and J200T (*CSE4-TAP/Cse4; sch9/sch9*) (grown at 30°) using anti-Protein A (Cse4) antibodies. Enrichment at *CEN7*, *CEN5* and non-centromeric region was analysed using semi- quantitative PCR. PCR using total DNA (T) or ChIP DNA fractions with (+) or without (-) antibodies was performed.
