# Supplementary material
Source: PubMed Central journal article supplement (PMC4349062)
Supplement: 415a6547905acec24d07c857ba900f53_genetics.114.173542-5.pdf [file 415a6547905acec24d07c857ba900f53_genetics.114.173542-5.pdf]

**Table S2 Primers used in this study**

| Primer name    | Sequence                                                                                                              | Description                                                            |
|----------------|-----------------------------------------------------------------------------------------------------------------------|------------------------------------------------------------------------|
| 2498-21        | CTG GTG CAA GAC CCT CAT AGA AGC                                                                                       | Semi-quantitative ChIP PCR primers for CEN7                            |
| 2498-22        | CCT GAC ACT GTC GTT TCC CAT AGC                                                                                       | Semi-quantitative ChIP PCR primers for CEN7                            |
| CEN5e          | TGTTCTGACATACTGGGTAGACTTT                                                                                             | Semi-quantitative ChIP PCR primers for CEN5                            |
| CEN5f          | CGAAGCATTTTGTATAACAGCCC                                                                                               | Semi-quantitative ChIP PCR primers for CEN5                            |
| CACH5R1        | TTCATGGAAGAGGGGTTTCA                                                                                                  | qPCR primers for CEN5                                                  |
| CACH5F1        | CCCGCAAATAAGCAAACACT                                                                                                  | qPCR primers for CEN5                                                  |
| NCEN7-3        | GCATACCTGACACTGTCGTT                                                                                                  | qPCR primers for CEN7                                                  |
| NCEN7-4        | AACGGTGCTACGTTTTTTTA                                                                                                  | qPCR primers for CEN7                                                  |
| Ctrl 7 a       | ACTCGCCTTCCCCTCCTTAAATAG                                                                                              | qPCR and semi-quantitative ChIP PCR primers for non centromeric region |
| Ctrl 7 b       | CCACTACTACGACTGTGGATCACT                                                                                              | qPCR and semi-quantitative ChIP PCR primers for non centromeric region |
| Sch9-HA for    | GAAGAAGAAGATGAAATGGAAGTTGATGAAGAT<br>CAACATATGGATGATGAATTTGTCAATGGAAGAT<br>TTGATCTTGGTGGTGGTCCGGATCCCCGGGTTAAT<br>TAA | HA tagging                                                             |
| Sch9-HA rev    | GCACAAAATGGAGAAGGAGAAAAAGTAGGAAC<br>GGAATTCTATTGAATGGAACAGTTTAGTTCTAGA<br>AGGACCACCTTTGATTG                           | HA tagging                                                             |
| Sch9ver        | GTTGATTCTGGTCATTAGG                                                                                                   | Tagging verification primers                                           |
| 3' test HA-tag | CATCGTATGGGTAAAAGATG                                                                                                  | Tagging verification primers                                           |
| NV195          | AGTGGTACCGGTGCGATGTATAACTTCATTTTTCAT                                                                                  | Clp10 cloning forward                                                  |
| NV196          | ACGCGTTCGAGCAC AGA CAT TGG GCA AGA AA                                                                                 | Clp10 cloning reverse                                                  |
| UP-RPS10       | TTCTGGTGTCTCTCACTGTTAAGC                                                                                              | Clp10 integration confirmation forward                                 |
| NV207          | GAGTTATTAGCCCTGCGATCTTTG                                                                                              | Clp10 integration confirmation reverse                                 |
