# Supplementary material
Source: PubMed Central journal article supplement (PMC4349062)
Supplement: 212331da3921103e71d88ce7474d9bad_genetics.114.173542-4.pdf [file 212331da3921103e71d88ce7474d9bad_genetics.114.173542-4.pdf]

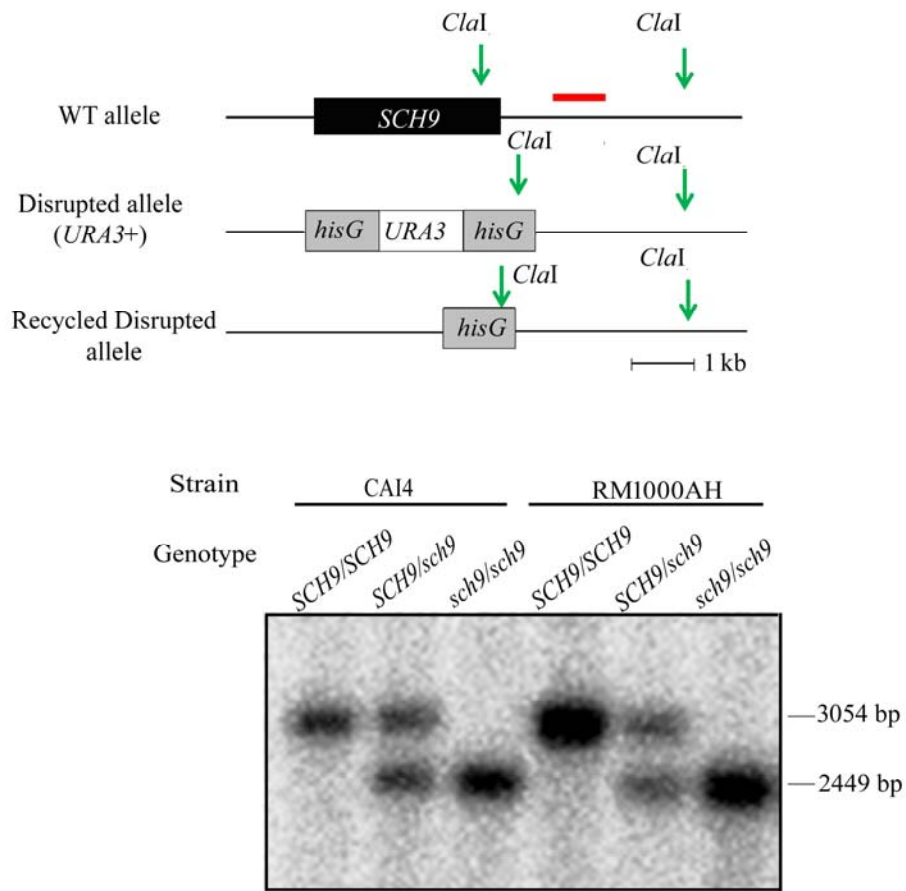

**Figure S1** Southern blot analysis. Line diagrams showing wild-type and disrupted alleles of *SCH9*. *Cla*I digested DNA from wild-type strains (CAI4, RM1000AH) and corresponding heterozygous and null mutant strains lacking one or both copies of *SCH9* gene was separated on an agarose gel, blotted and probed with a region marked by the red line. Green arrows indicate *Cla*I sites. Bar, 1 kb.
