# Supplementary material
Source: PubMed Central journal article supplement (PMC4349062)
Supplement: d55378c6c30985635742af8c4a3846d8_genetics.114.173542-6.pdf [file d55378c6c30985635742af8c4a3846d8_genetics.114.173542-6.pdf]

**Table S1 Strains used in this study**

| <b>Name</b> | <b>Parent</b> | <b>Genotype</b>                                                                                                        | <b>Reference</b>                |
|-------------|---------------|------------------------------------------------------------------------------------------------------------------------|---------------------------------|
| CAI4        | SC5314        | <i>ura3::imm434/ura3::imm434</i>                                                                                       | Fonzi <i>et al</i> 1993         |
| CAS1        | CAI4          | as CAI4 but <i>SCH9/sch9::hisG-URA3-hisG</i>                                                                           | Stichernoth <i>et al</i> , 2011 |
| CAS2        | CAS1          | as CAI4 but <i>SCH9/sch9::hisG</i>                                                                                     | Stichernoth <i>et al</i> , 2011 |
| CCS3        | CAS2          | as CAI4 but <i>sch9::hisG/sch9::hisG URA3/ura3::imm434</i>                                                             | Stichernoth <i>et al</i> , 2011 |
| AF1006      | CAS2          | as CAS2 but <i>SCH9::(3xHA-URA3)/sch9::hisG</i>                                                                        | This study                      |
| RM1000AH    | RM1000        | <i>Δura3::imm434/Δura3::imm434Δhis1::hisG/Δhis1::hisG arg4::HIS1/ARG4</i>                                              | Sanyal <i>et al</i> , 2004      |
| RMKS1A      | RM1000AH      | <i>Δura3::imm434/Δura3::imm434 Δhis1::hisG/Δhis1::hisG arg4::HIS1/ARG4 sch9::hisG/SCH9</i>                             | This study                      |
| RMKS1B      | RM1000AH      | <i>Δura3::imm434/Δura3::imm434 Δhis1::hisG/Δhis1::hisG arg4::HIS1/ARG4 sch9::hisG/SCH9</i>                             | This study                      |
| RMKS2A      | RMKS1A        | <i>Δura3::imm434/Δura3::imm434 Δhis1::hisG/Δhis1::hisG arg4::HIS1/ARG4 sch9::hisG/sch9::hisG-URA3-hisG</i>             | This study                      |
| RMKS2B      | RMKS1B        | <i>Δura3::imm434/Δura3::imm434 Δhis1::hisG/Δhis1::hisG arg4::HIS1/ARG4 sch9::hisG/sch9::hisG-URA3-hisG</i>             | This study                      |
| RMKS1AR     | RMKS1A        | <i>Δura3::imm434/Δura3::imm434 Δhis1::hisG/Δhis1::hisG arg4::HIS1/ARG4 sch9::hisG/SCH9/Cip10-SCH9</i>                  | This study                      |
| RMKS1BR     | RMKS1B        | <i>Δura3::imm434/Δura3::imm434 Δhis1::hisG/Δhis1::hisG arg4::HIS1/ARG4 sch9::hisG/SCH9/Cip10-SCH9</i>                  | This study                      |
| RMKS2AR     | RMKS2A        | <i>Δura3::imm434/Δura3::imm434 Δhis1::hisG/Δhis1::hisG arg4::HIS1/ARG4 sch9::hisG/sch9::hisG-URA3-hisG/ Cip10-SCH9</i> | This study                      |
| RMKS2BR     | RMKS2B        | <i>Δura3::imm434/Δura3::imm434 Δhis1::hisG/Δhis1::hisG arg4::HIS1/ARG4 sch9::hisG/sch9::hisG-URA3-hisG/ Cip10-SCH9</i> | This study                      |
| 8675        | BWP17         | <i>Δura3::λimm434/Δura3::imm434 Δhis1::hisG/Δhis1::hisGΔarg4::hisG/arg4::hisG CSE4/CSE4:GFP:CSE4</i>                   | Joglekaret <i>et al</i> , 2008  |

|         |          |                                                                                                                                                                        |                            |
|---------|----------|------------------------------------------------------------------------------------------------------------------------------------------------------------------------|----------------------------|
| 8675t   | 8675     | <i>Δ ura3::λimm434/Δura3::imm434</i><br><i>Δhis1::hisG/Δhis1::hisGΔarg4::hisG/Δarg4:: hisG</i><br><i>CSE4/CSE4:GFP:CSE4 sch9::hisG/SCH9</i>                            | This study                 |
| 8675T   | 8675t    | <i>Δ ura3::λimm434/Δura3::imm434</i><br><i>Δhis1::hisG/Δhis1::hisGΔarg4::hisG/Δarg4:: hisG</i><br><i>CSE4/CSE4:GFP:CSE4 sch9::hisG/sch9::hisG-URA3-</i><br><i>hisG</i> | This study                 |
| CAKS102 | SN148    | <i>Δura3::imm434/Δura3::imm434,</i><br><i>Δhis1::hisG/Δhis1::hisG, Δarg4::hisG/Δarg4::hisG,</i><br><i>Δleu2::hisG/Δleu2::hisG CSE4/CSE4-TAP(URA3)</i>                  | Mitra <i>et al</i> , 2014  |
| J200    | RM1000AH | <i>Δura3::imm434/ Δura3::imm434 Δhis1::hisG/</i><br><i>Δhis1::hisG arg4::HIS1/ARG4 CSE4/CSE4TAP-NAT</i>                                                                | Thakur <i>et al</i> , 2013 |
| J200T   | J200     | <i>ura3::imm434/ ura3::imm434 his1::hisG/his1::hisG</i><br><i>arg4::HIS1/ARG4 sch9::hisG/sch9::hisG-URA3-hisG</i><br><i>CSE4::CSE4-TAP-NAT</i>                         | This study                 |
